# Supplementary material for: Facile solvothermal assisted g-C3N4post-grafting with aromatic amine dyes for effective photocatalytic hydrogen evolution
Source: Royal Society of Chemistry journal article supplement (doi:10.1039/d2nj02812c), 2022-01-01
Supplement: d2nj02812c1.pdf [file d2nj02812c1.pdf]

Electronic Supplementary Material (ESI) for New Journal of Chemistry.

## Facile solvothermally method assisted g-C<sub>3</sub>N<sub>4</sub> post-grafting with aromatic amine dyes for highly photocatalytic hydrogen evolution

Xiaodi Chen,<sup>†a</sup> Hailian Bao,<sup>†a</sup> Shihang Liu,<sup>a</sup> Xingliang Liu,<sup>a</sup> Chao Zhang<sup>\*a</sup>

*a. School of Chemical Engineering, Qinghai University, Xining 810016, Qinghai, China.*

E-mail: zhangchaoqhu@126.com

### Contents

|                                                                                                                                                                                                                                                             |    |
|-------------------------------------------------------------------------------------------------------------------------------------------------------------------------------------------------------------------------------------------------------------|----|
| 1. The TEM images of g-C <sub>3</sub> N <sub>4</sub> , g-C <sub>3</sub> N <sub>4</sub> /TPA-CNCHO, g-C <sub>3</sub> N <sub>4</sub> /PTZ-CNCHO, g-C <sub>3</sub> N <sub>4</sub> /CZ-CNCHO.                                                                   | S2 |
| 2. The element map of g-C <sub>3</sub> N <sub>4</sub> /TPA-CNCHO.                                                                                                                                                                                           | S2 |
| 3. The N <sub>2</sub> adsorption desorption isotherms and pore size distribution of g-C <sub>3</sub> N <sub>4</sub> , g-C <sub>3</sub> N <sub>4</sub> /TPA-CNCHO, g-C <sub>3</sub> N <sub>4</sub> /PTZ-CNCHO and g-C <sub>3</sub> N <sub>4</sub> /CZ-CNCHO. | S3 |
| 4 The surface area and pore diameter of g-C <sub>3</sub> N <sub>4</sub> , g-C <sub>3</sub> N <sub>4</sub> /TPA-CNCHO, g-C <sub>3</sub> N <sub>4</sub> -PTZ-CNCHO and g-C <sub>3</sub> N <sub>4</sub> -CZ-CNCHO.                                             | S3 |
| 5 XPS spectra of C1s of g-C <sub>3</sub> N <sub>4</sub> (a) and g-C <sub>3</sub> N <sub>4</sub> /PTZ-CNCHO.                                                                                                                                                 | S3 |
| 6 Optical photos of relevant samples.                                                                                                                                                                                                                       | S4 |
| 7 LSV curves of g-C <sub>3</sub> N <sub>4</sub> , g-C <sub>3</sub> N <sub>4</sub> /TPA-CNCHO, g-C <sub>3</sub> N <sub>4</sub> /PTZ-CNCHO and g-C <sub>3</sub> N <sub>4</sub> /CZ-CNCHO.                                                                     | S4 |
| 8 The WCA of g-C <sub>3</sub> N <sub>4</sub> (a), g-C <sub>3</sub> N <sub>4</sub> /TPA-CNCHO (b), g-C <sub>3</sub> N <sub>4</sub> /PTZ-CNCHO (c) and g-C <sub>3</sub> N <sub>4</sub> /CZ-CNCHO (d).                                                         | S5 |
| 9 The photocatalytic hydrogen evolution rate of g-C <sub>3</sub> N <sub>4</sub> , g-C <sub>3</sub> N <sub>4</sub> /TPA-CNCHO and g-C <sub>3</sub> N <sub>4</sub> -TPA-CNCHO.                                                                                | S5 |
| 10 The comparison of other dye grafted photocatalyst via Schiff's base reaction for photocatalytic H <sub>2</sub> production or other use.                                                                                                                  | S6 |
| 11 DFT calculated geometry structures and electron densities of LUMOs and HOMOs of TPA-CNCHO, PTZ-CNCHO and CZ-CNCHO at B3LYP/6-31G(d) level.                                                                                                               | S6 |

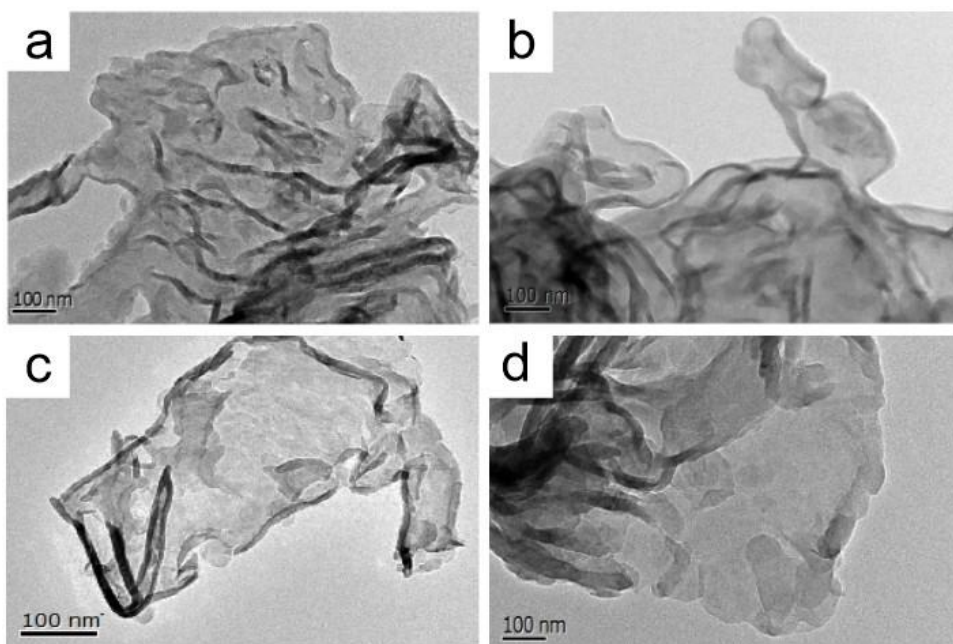

Fig. S1 The TEM images of samples (a)  $g\text{-C}_3\text{N}_4$ , (b)  $g\text{-C}_3\text{N}_4/\text{TPA-CNCHO}$ , (c)  $g\text{-C}_3\text{N}_4/\text{PTZ-CNCHO}$ , (d)  $g\text{-C}_3\text{N}_4/\text{CZ-CNCHO}$ .

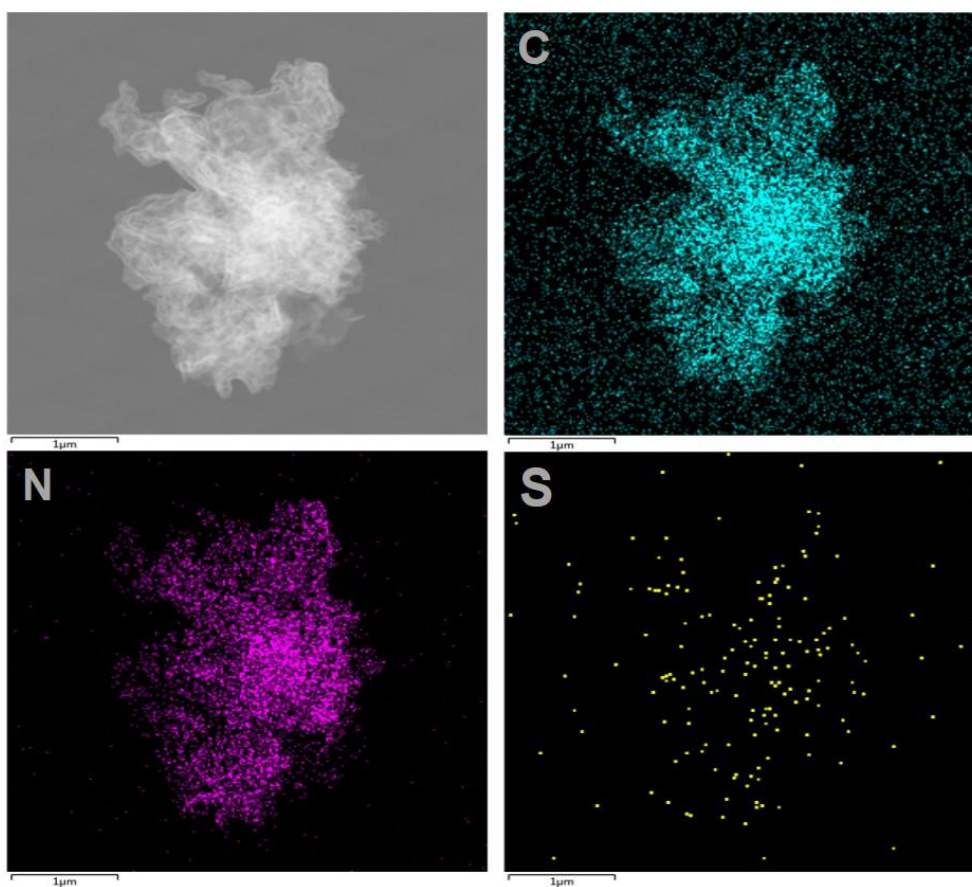

Fig. S2 The element map of  $g\text{-C}_3\text{N}_4/\text{TPA-CNCHO}$  (C (green), N (purple), S (yellow)).

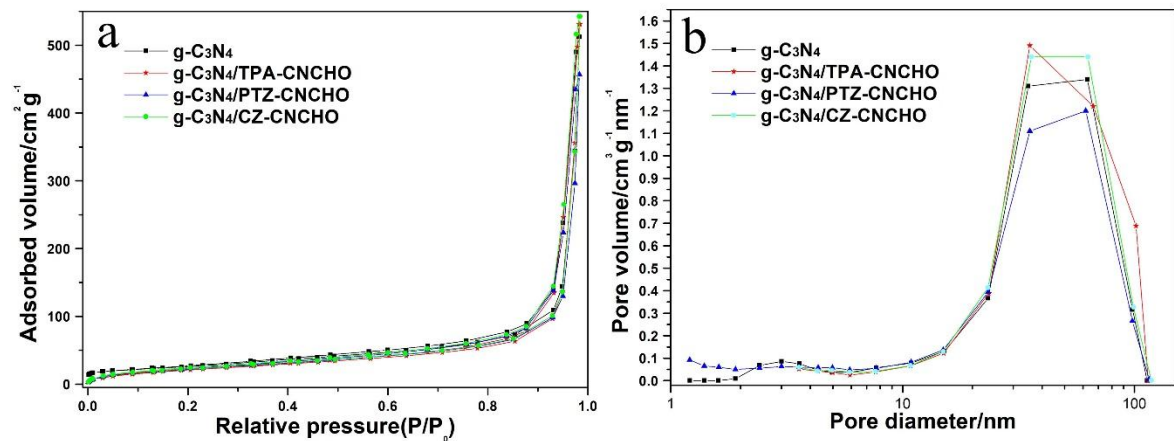

Fig. S3 The N<sub>2</sub> adsorption-desorption isotherms and pore size distribution of samples (a) g-C<sub>3</sub>N<sub>4</sub>, (b) g-C<sub>3</sub>N<sub>4</sub>/TPA-CNCHO, (c) g-C<sub>3</sub>N<sub>4</sub>/PTZ-CNCHO and (d) g-C<sub>3</sub>N<sub>4</sub>/CZ-CNCHO.

Table S1. The surface area and pore diameter of g-C<sub>3</sub>N<sub>4</sub>, g-C<sub>3</sub>N<sub>4</sub>/TPA-CNCHO, g-C<sub>3</sub>N<sub>4</sub>/PTZ-CNCHO and g-C<sub>3</sub>N<sub>4</sub>/CZ-CNCHO.

| Sample                                     | S <sub>BET</sub> (m <sup>2</sup> /g) | Pore diameter-max (nm) |
|--------------------------------------------|--------------------------------------|------------------------|
| g-C <sub>3</sub> N <sub>4</sub>            | 95.0                                 | 34.9                   |
| g-C <sub>3</sub> N <sub>4</sub> -TPA-CNCHO | 82.5                                 | 35.4                   |
| g-C <sub>3</sub> N <sub>4</sub> -PTZ-CNCHO | 86.6                                 | 36.1                   |
| g-C <sub>3</sub> N <sub>4</sub> -CZ-CNCHO  | 88.1                                 | 35.9                   |

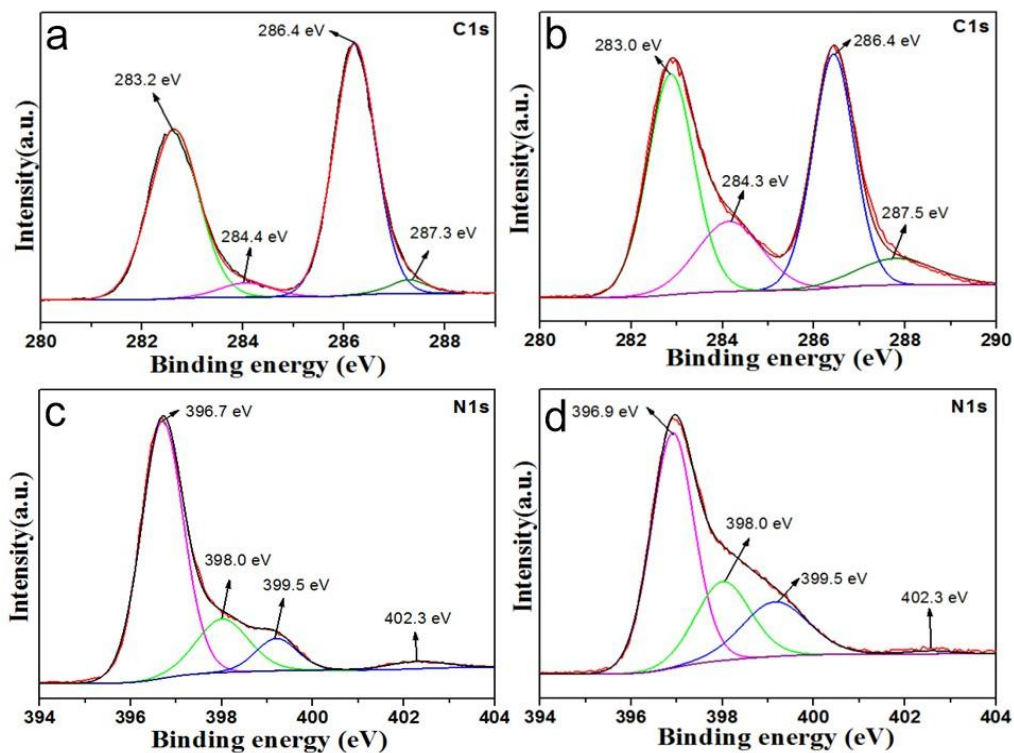

Fig. S4 XPS spectra of C1s of g-C<sub>3</sub>N<sub>4</sub> (a) and g-C<sub>3</sub>N<sub>4</sub>/PTZ-CNCHO (b), N1s of g-C<sub>3</sub>N<sub>4</sub> (c) and N1s of g-C<sub>3</sub>N<sub>4</sub>/PTZ-CNCHO (d)

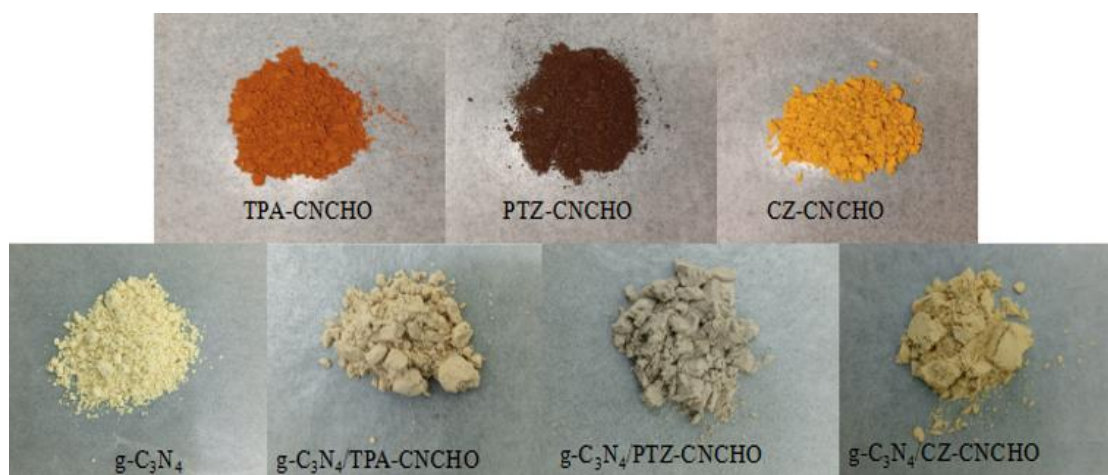

Fig. S5 Optical photos of relevant samples.

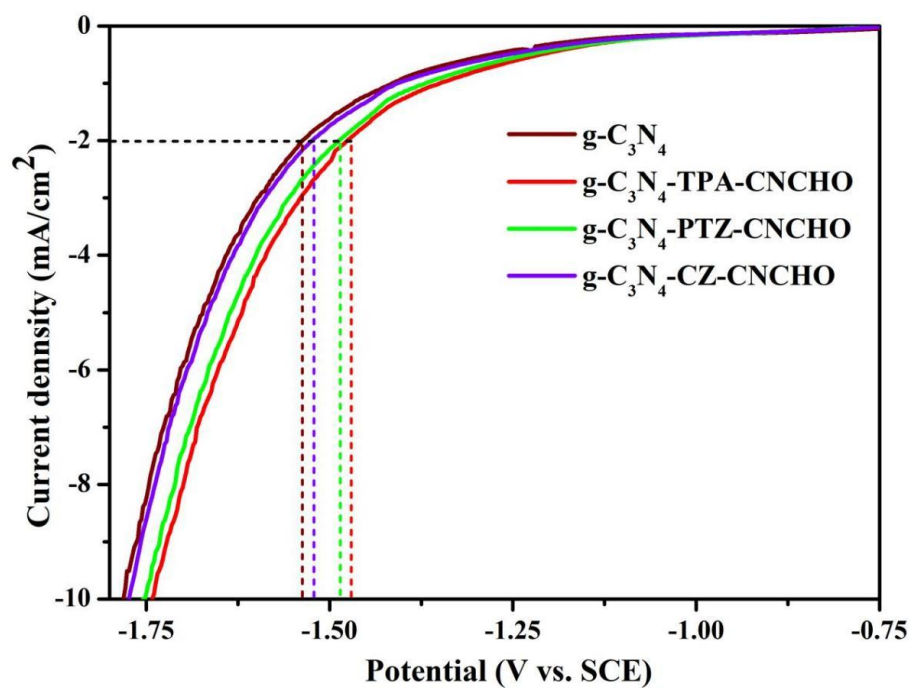

Fig. S6 LSV curves of  $g-C_3N_4$ ,  $g-C_3N_4/TPA-CNCHO$ ,  $g-C_3N_4/PTZ-CNCHO$  and  $g-C_3N_4/CZ-CNCHO$ .

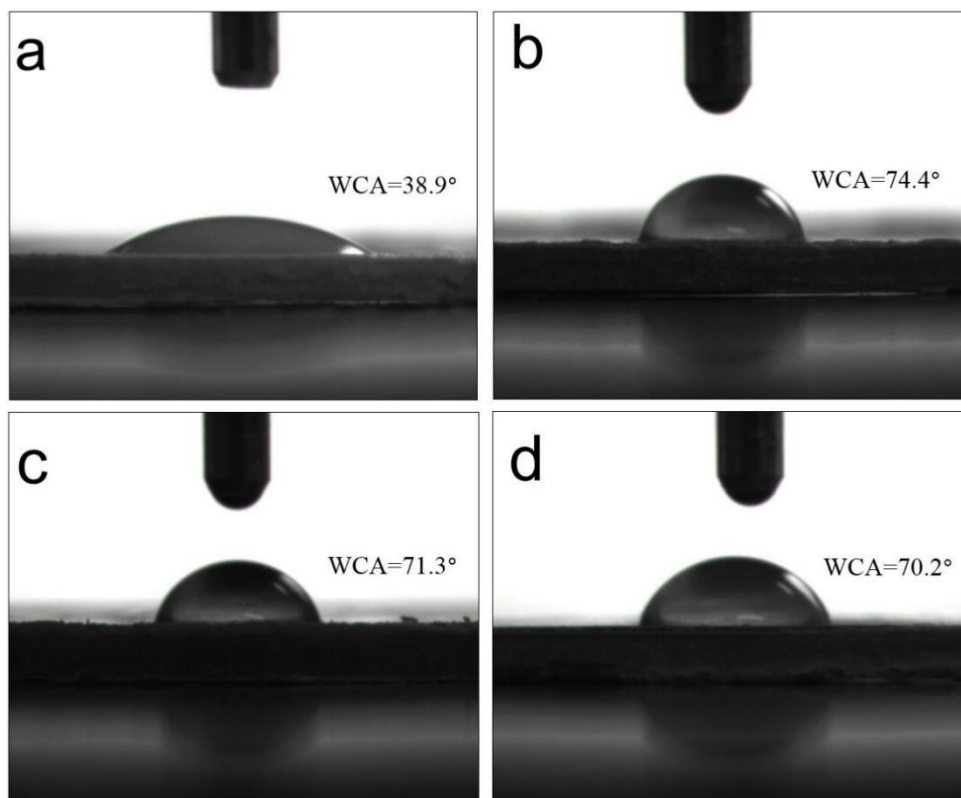

Fig. S7 The WCA of  $g\text{-C}_3\text{N}_4$  (a),  $g\text{-C}_3\text{N}_4/\text{TPA-CNCHO}$  (b),  $g\text{-C}_3\text{N}_4/\text{PTZ-CNCHO}$  (c) and  $g\text{-C}_3\text{N}_4/\text{CZ-CNCHO}$  (d).

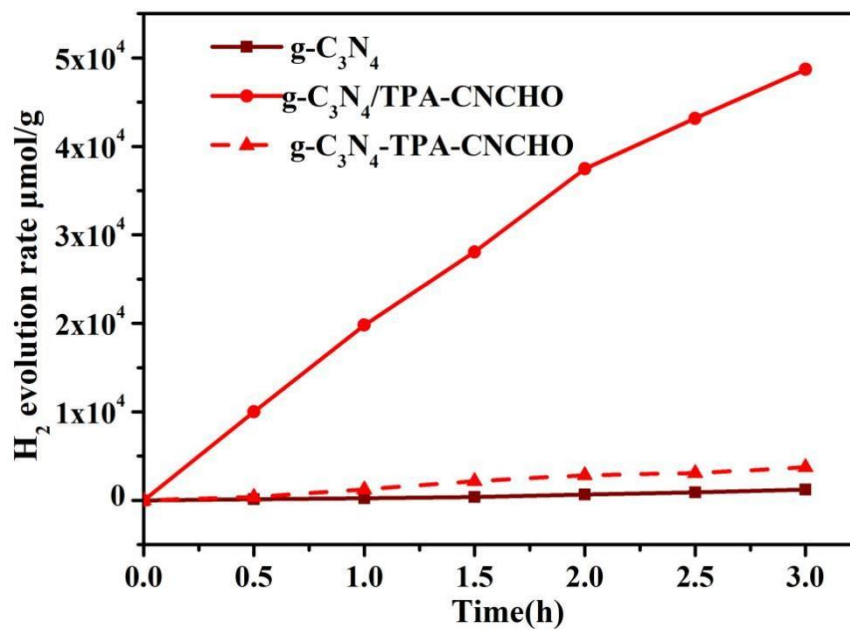

Fig. S8 The photocatalytic hydrogen evolution rate of  $g\text{-C}_3\text{N}_4$ ,  $g\text{-C}_3\text{N}_4/\text{TPA-CNCHO}$  and  $g\text{-C}_3\text{N}_4\text{-TPA-CNCHO}$ .

Table S2. The comparison of other dye grafted photocatalyst via Schiff's base reaction for photocatalytic H<sub>2</sub> production or other use.

| Photocatalyst                                    | Modification method                    | Modification conditions                        | Photocatalytic Reaction conditions              | H <sub>2</sub> production activity (n times of g-C <sub>3</sub> N <sub>4</sub> )                                       | Other photocatalytic activity                                                | Ref.      |
|--------------------------------------------------|----------------------------------------|------------------------------------------------|-------------------------------------------------|------------------------------------------------------------------------------------------------------------------------|------------------------------------------------------------------------------|-----------|
| melamine / p-benzaldehyde                        | copolymerization                       | insert gas<br>PPL lined autoclave<br>250°C, 6h | triethanolamine (TEOA)<br>$\lambda \geq 420$ nm | 58.1 mmol·h <sup>-1</sup> (n=2)                                                                                        | none                                                                         | S1        |
| Urea/ p-benzaldehyde                             | Schiff's base reaction                 | 550°C, 2h,<br>5°C/min                          | TEOA<br>420 nm < $\lambda$ < 780nm              | 226 $\mu$ mol·h <sup>-1</sup> (n=2)                                                                                    | none                                                                         | S2        |
| g-C <sub>3</sub> N <sub>4</sub> / p-benzaldehyde | Schiff's base reaction (solid medium)  | 250°C, 5h,<br>5°C/min                          | TEOA<br>$\lambda \geq 420$ nm                   | 92.4 $\mu$ mol·h <sup>-1</sup> (n=4.1)                                                                                 | none                                                                         | S3        |
| g-C <sub>3</sub> N <sub>4</sub> / Feqpy-BA       | Schiff's base reaction (liquid medium) | blue LED light<br>24°C                         | TEOA<br>$\lambda = 460$ nm                      | none                                                                                                                   | The number of CO <sub>2</sub> conversion is 2554 and the selectivity is 95%. | S4        |
| TPA-CNCHO                                        | Schiff's base reaction                 | insert gas,<br>DDM                             | AA<br>$\lambda \geq 400$ nm                     | 16232.7 $\mu$ mol·h <sup>-1</sup> ·g <sup>-1</sup> (n=40)<br>13266.9 $\mu$ mol·h <sup>-1</sup> ·g <sup>-1</sup> (n=33) | none                                                                         | this work |
| PTZ-CNCHO                                        | Schiff's base reaction (liquid medium) | 240°C, 15h                                     |                                                 | 11822.8 $\mu$ mol·h <sup>-1</sup> ·g <sup>-1</sup> (n=29)                                                              |                                                                              |           |
| CZ-CNCHO                                         |                                        |                                                |                                                 |                                                                                                                        |                                                                              |           |

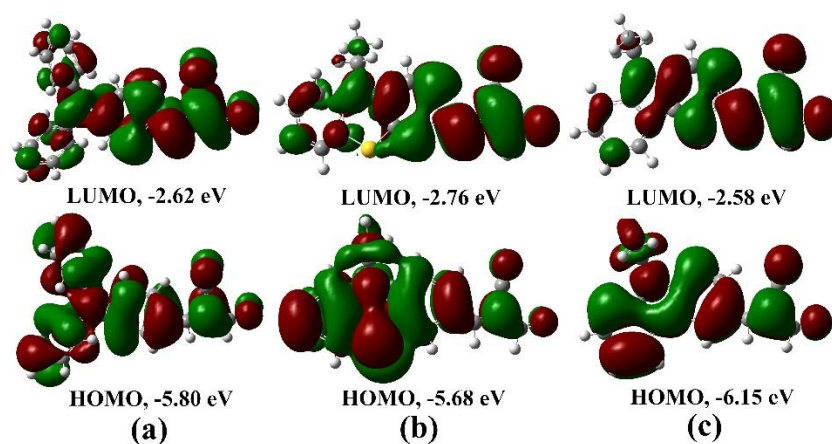

Fig. S9 DFT calculated geometry structures and electron densities of LUMOs and HOMOs of (a) TPA-CNCHO, (b) PTZ-CNCHO and (c) CZ-CNCHO at B3LYP/6-31G(d) level.

## References

S1 X. Huang, Z. Wu, H. Zheng, W. Dong, G. Wang, A sustainable method toward melamine-based conjugated polymer semiconductors for efficient photocatalytic hydrogen production under visible light, *Green Chem.*, 2017,

20, 664-670.

S2 X. Fan, L. Zhang, M. Wang, W. Huang, Y. Zhou, M. Li, R. Cheng, J. Shi, Constructing carbon-nitride-based copolymers via Schiff base chemistry for visible-light photocatalytic hydrogen evolution, *Appl. Catal. B Environ.*, 2015, 182, 68-73.

S3 J. Tian, L. Zhang, X. Fan, Y. Zhou, M. Wang, R. Cheng, M. Li, X. Kan, X. Jin, Z. Liu, Y. Gao, J. Shi, A post-grafting strategy to modify g-C<sub>3</sub>N<sub>4</sub> with aromatic heterocycles for enhanced photocatalytic activity, *J. Mater. Chem. A*, 2016, 4, 13814-13821.

S4 Y. Wei, L. Chen, H. Chen, L. Cai, G. Tan, Y. Qiu, Q. Xiang, G. Chen, T. Lau, M. Robert, Highly efficient photocatalytic reduction of CO<sub>2</sub> to CO by in situ formation of a hybrid catalytic system based on molecular iron quaterpyridine covalently linked to carbon nitride, *Angew. Chem., Int. Ed.*, 2022. 10.1002 /ange202116832.
